# Supplementary material for: Growth mechanism of an aluminium-induced solid phase epitaxial (AI-SPE) Si0.5Ge0.5layer using in situ heating transmission electron microscopy
Source: Royal Society of Chemistry journal article supplement (doi:10.1039/c6ce00657d), 2016-01-01
Supplement: c6ce00657d1.pdf [file c6ce00657d1.pdf]

**Supplementary for:**

**Growth mechanism of aluminium-induced solid phase epitaxial (AI-SPE)  $\text{Si}_{0.5}\text{Ge}_{0.5}$  layer using in-situ heating transmission electron microscopy**

Chuan-Jung Lin,<sup>a,‡</sup> Chien-Chung Hsu,<sup>a,‡</sup> Sheng-Min Yu,<sup>a,‡</sup> Yu-Chun Huang,<sup>a</sup> Sung-Yen Wei,<sup>b</sup> Wen-Ching Sun,<sup>b</sup> Tzer-Shen Lin,<sup>b</sup> and Fu-Rong Chen,<sup>a,\*</sup>

<sup>a</sup>Department of Engineering and System Science, National Tsing Hua University, Hsinchu 30013, Taiwan, R. O. C.

<sup>b</sup>Material and Chemical Research Laboratories, Industrial Technology Research Institute, Chutung, Hsinchu 31040, Taiwan, R. O. C.

<sup>‡</sup>These authors contributed to the work equally and should be regarded as co-first authors.

\*Corresponding author: fchen1@me.com; Fax: (+886)-3-5734066;

Tel: (+886)-3-5715131 Ext. 62247

**Table S1.** The Si and Ge parameters excerpt from reference 1 for thermodynamic analysis<sup>1</sup>. Based on Si and Ge parameters, the energies of  $\text{Si}_{0.75}\text{Ge}_{0.25}$ ,  $\text{Si}_{0.50}\text{Ge}_{0.50}$ , and  $\text{Si}_{0.25}\text{Ge}_{0.75}$  are approximately value depending on stoichiometry<sup>2</sup>. The detailed formulas are given in reference 1 and summarized in following.

| Crystalline phase                                        | $\langle \text{Si} \rangle$ | $\langle \text{Si}_{0.75}\text{Ge}_{0.25} \rangle$ | $\langle \text{Si}_{0.50}\text{Ge}_{0.50} \rangle$ | $\langle \text{Si}_{0.25}\text{Ge}_{0.75} \rangle$ | $\langle \text{Ge} \rangle$ | $\langle \text{Al} \rangle$ |
|----------------------------------------------------------|-----------------------------|----------------------------------------------------|----------------------------------------------------|----------------------------------------------------|-----------------------------|-----------------------------|
| $\gamma^s(T_0)$ ( $\text{J m}^{-2}$ )                    | 1.37                        | 1.27                                               | 1.17                                               | 1.07                                               | 0.97                        | 1.03                        |
| $T_0$ (K)                                                | 493                         | 488                                                | 483                                                | 478                                                | 473                         | 500                         |
| $V_m$<br>( $\times 10^{-6} \text{m}^3 \text{mol}^{-1}$ ) | 12.13                       | 12.51                                              | 12.89                                              | 13.27                                              | 13.65                       | 10.06                       |
| Amorphous phase                                          | $\{ \text{Si} \}$           | $\{ \text{Si}_{0.75}\text{Ge}_{0.25} \}$           | $\{ \text{Si}_{0.50}\text{Ge}_{0.50} \}$           | $\{ \text{Si}_{0.25}\text{Ge}_{0.75} \}$           | $\{ \text{Ge} \}$           |                             |
| $\gamma^s(T_0)$ ( $\text{J m}^{-2}$ )                    | 0.87                        | 0.81                                               | 0.75                                               | 0.68                                               | 0.62                        |                             |
| $T_0$ (K)                                                | 1685                        | 1567                                               | 1448                                               | 1330                                               | 1211                        |                             |
| $V_m$<br>( $\times 10^{-6} \text{m}^3 \text{mol}^{-1}$ ) | 11.10                       | 11.57                                              | 12.03                                              | 12.50                                              | 12.97                       |                             |

|                                                                    |                                                       |                                                                                                                       |                                                                                                                     |                                                                                                                             |                                             |                                 |
|--------------------------------------------------------------------|-------------------------------------------------------|-----------------------------------------------------------------------------------------------------------------------|---------------------------------------------------------------------------------------------------------------------|-----------------------------------------------------------------------------------------------------------------------------|---------------------------------------------|---------------------------------|
| $\Delta H_{\text{Al}}^0$ in (Si)                                   | $\Delta H_{\text{Si}}^0$ in (Al)                      | $\Delta H_{\text{Si}(\text{diam}) \rightarrow \text{Si}(\text{fcc})}^0$                                               | $\Delta S_{\text{Si}(\text{diam}) \rightarrow \text{Si}(\text{fcc})}$                                               | $\Delta H_{\text{Al}}^0$ in (Si)<br>$\Delta H_{\text{Si}}^0$ in (Al)                                                        | $\Theta_{\text{Si}}$                        | $\Delta H_{\text{Al}}^m$        |
| 47857 ( $\text{J mol}^{-1}$ )                                      | -3143 ( $\text{J mol}^{-1}$ )                         | 51000 ( $\text{J mol}^{-1}$ )                                                                                         | 21.8 ( $\text{J mol}^{-1} \text{K}^{-1}$ )                                                                          | -11304 ( $\text{J mol}^{-1}$ )                                                                                              | 645 K                                       | 10784.4 ( $\text{J mol}^{-1}$ ) |
| $\Delta H_{\text{Al}}^0$ in ( $\text{Si}_{0.75}\text{Ge}_{0.25}$ ) | $\Delta H_{\text{Si}_{0.75}\text{Ge}_{0.25}}$ in (Al) | $\Delta H_{\text{Si}_{0.75}\text{Ge}_{0.25}(\text{diam}) \rightarrow \text{Si}_{0.75}\text{Ge}_{0.25}(\text{fcc})}^0$ | $\Delta S_{\text{Si}_{0.75}\text{Ge}_{0.25}(\text{diam}) \rightarrow \text{Si}_{0.75}\text{Ge}_{0.25}(\text{fcc})}$ | $\Delta H_{\text{Al}}^0$ in ( $\text{Si}_{0.75}\text{Ge}_{0.25}$ )<br>$\Delta H_{\text{Si}_{0.75}\text{Ge}_{0.25}}$ in (Al) | $\Theta_{\text{Si}_{0.75}\text{Ge}_{0.25}}$ |                                 |
| 44107 ( $\text{J mol}^{-1}$ )                                      | -3143 ( $\text{J mol}^{-1}$ )                         | 47250 ( $\text{J mol}^{-1}$ )                                                                                         | 21.92 ( $\text{J mol}^{-1} \text{K}^{-1}$ )                                                                         | -11304 ( $\text{J mol}^{-1}$ )                                                                                              | 557.25 K                                    |                                 |
| $\Delta H_{\text{Al}}^0$ in ( $\text{Si}_{0.50}\text{Ge}_{0.50}$ ) | $\Delta H_{\text{Si}_{0.50}\text{Ge}_{0.50}}$ in (Al) | $\Delta H_{\text{Si}_{0.50}\text{Ge}_{0.50}(\text{diam}) \rightarrow \text{Si}_{0.50}\text{Ge}_{0.50}(\text{fcc})}^0$ | $\Delta S_{\text{Si}_{0.50}\text{Ge}_{0.50}(\text{diam}) \rightarrow \text{Si}_{0.50}\text{Ge}_{0.50}(\text{fcc})}$ | $\Delta H_{\text{Al}}^0$ in ( $\text{Si}_{0.50}\text{Ge}_{0.50}$ )<br>$\Delta H_{\text{Si}_{0.50}\text{Ge}_{0.50}}$ in (Al) | $\Theta_{\text{Si}_{0.50}\text{Ge}_{0.50}}$ |                                 |
| 40357 ( $\text{J mol}^{-1}$ )                                      | -3143 ( $\text{J mol}^{-1}$ )                         | 43500 ( $\text{J mol}^{-1}$ )                                                                                         | 22.05 ( $\text{J mol}^{-1} \text{K}^{-1}$ )                                                                         | -11304 ( $\text{J mol}^{-1}$ )                                                                                              | 509.5 K                                     |                                 |
| $\Delta H_{\text{Al}}^0$ in ( $\text{Si}_{0.25}\text{Ge}_{0.75}$ ) | $\Delta H_{\text{Si}_{0.25}\text{Ge}_{0.75}}$ in (Al) | $\Delta H_{\text{Si}_{0.25}\text{Ge}_{0.75}(\text{diam}) \rightarrow \text{Si}_{0.25}\text{Ge}_{0.75}(\text{fcc})}^0$ | $\Delta S_{\text{Si}_{0.25}\text{Ge}_{0.75}(\text{diam}) \rightarrow \text{Si}_{0.25}\text{Ge}_{0.75}(\text{fcc})}$ | $\Delta H_{\text{Al}}^0$ in ( $\text{Si}_{0.25}\text{Ge}_{0.75}$ )<br>$\Delta H_{\text{Si}_{0.25}\text{Ge}_{0.75}}$ in (Al) | $\Theta_{\text{Si}_{0.25}\text{Ge}_{0.75}}$ |                                 |
| 36607 ( $\text{J mol}^{-1}$ )                                      | -3143 ( $\text{J mol}^{-1}$ )                         | 39750 ( $\text{J mol}^{-1}$ )                                                                                         | 22.18 ( $\text{J mol}^{-1} \text{K}^{-1}$ )                                                                         | -11304 ( $\text{J mol}^{-1}$ )                                                                                              | 441.75 K                                    |                                 |
| $\Delta H_{\text{Al}}^0$ in (Ge)                                   | $\Delta H_{\text{Ge}}^0$ in (Al)                      | $\Delta H_{\text{Ge}(\text{diam}) \rightarrow \text{Ge}(\text{fcc})}^0$                                               | $\Delta S_{\text{Ge}(\text{diam}) \rightarrow \text{Ge}(\text{fcc})}$                                               | $\Delta H_{\text{Al}}^0$ in (Ge)<br>$\Delta H_{\text{Ge}}^0$ in (Al)                                                        | $\Theta_{\text{Ge}}$                        | $\Theta_{\text{Al}}$            |
| 32857 ( $\text{J mol}^{-1}$ )                                      | -3143 ( $\text{J mol}^{-1}$ )                         | 36000 ( $\text{J mol}^{-1}$ )                                                                                         | 22.3 ( $\text{J mol}^{-1} \text{K}^{-1}$ )                                                                          | -11304 ( $\text{J mol}^{-1}$ )                                                                                              | 374 K                                       | 428 K                           |

## The thermodynamic formulas used in this study<sup>1</sup>:

### 1. Crystallization energy

$$\Delta G_{\langle \text{Si}_{1-x}\text{Ge}_x \rangle - \{\text{Si}_{1-x}\text{Ge}_x\}}^{\text{Crystal}}(T) = \Delta H_{\langle \text{Si}_{1-x}\text{Ge}_x \rangle - \{\text{Si}_{1-x}\text{Ge}_x\}}^{\text{Crystal}}(T) - T \cdot \Delta S_{\langle \text{Si}_{1-x}\text{Ge}_x \rangle - \{\text{Si}_{1-x}\text{Ge}_x\}}^{\text{Crystal}}(T)$$

$$\Delta H_{\langle \text{Si}_{1-x}\text{Ge}_x \rangle - \{\text{Si}_{1-x}\text{Ge}_x\}}^{\text{Crystal}}(T) = \Delta H_{\langle \text{Si}_{1-x}\text{Ge}_x \rangle - \{\text{Si}_{1-x}\text{Ge}_x\}}^{\text{Crystal}}(T_c) + \int_{T_c}^T \Delta C_p(T) dT$$

$$\Delta S_{\langle \text{Si}_{1-x}\text{Ge}_x \rangle - \{\text{Si}_{1-x}\text{Ge}_x\}}^{\text{Crystal}}(T) = S_{\{\text{Si}_{1-x}\text{Ge}_x\}}^0 + \int_0^T \frac{\Delta C_p}{T} dT$$

where,  $\Delta H_{\langle \text{Si}_{1-x}\text{Ge}_x \rangle - \{\text{Si}_{1-x}\text{Ge}_x\}}^{\text{Crystal}}$  and  $\Delta S_{\langle \text{Si}_{1-x}\text{Ge}_x \rangle - \{\text{Si}_{1-x}\text{Ge}_x\}}^{\text{Crystal}}$  are the crystallization enthalpy and crystallization entropy of  $\text{Si}_{1-x}\text{Ge}_x$ , respectively; the symbol of  $\langle \rangle$  means crystalline phase; the symbol of  $\{ \}$  represents amorphous phase;  $T_c$  stands for the crystallization temperature.  $\Delta C_p(T)$  is the specific heat difference between the crystalline and amorphous phases;  $S^0$  are the residual entropies of amorphous phase at 0K.

### 2. Surface energy

$$\gamma_{\langle \text{Si}_{1-x}\text{Ge}_x \rangle}^{\text{S}} = \frac{(\gamma_{\{\text{Si}_{1-x}\text{Ge}_x\}}^{\text{S}}(T_0) \times 0.35 \times C_0 \times V_{\langle \text{Si}_{1-x}\text{Ge}_x \rangle}^{2/3} + T_0 \times S_{\langle \text{Si}_{1-x}\text{Ge}_x \rangle}^{\text{S}}) - T \times S_{\langle \text{Si}_{1-x}\text{Ge}_x \rangle}^{\text{S}}}{0.35 \times C_0 V_{\langle \text{Si}_{1-x}\text{Ge}_x \rangle}^{2/3}}$$

$$\gamma_{\{\text{Si}_{1-x}\text{Ge}_x\}}^{\text{S}} = \frac{(\gamma_{\{\text{Si}_{1-x}\text{Ge}_x\}}^{\text{S}}(T_0) \times 0.33 \times C_0 \times V_{\{\text{Si}_{1-x}\text{Ge}_x\}}^{2/3} + T_0 \times S_{\{\text{Si}_{1-x}\text{Ge}_x\}}^{\text{S}}) - T \times S_{\{\text{Si}_{1-x}\text{Ge}_x\}}^{\text{S}}}{0.33 \times C_0 V_{\{\text{Si}_{1-x}\text{Ge}_x\}}^{2/3}}$$

Where the symbol of  $\langle \rangle$  means crystalline phase; the symbol of  $\{ \}$  represents amorphous phase;  $\gamma_{\langle \text{Si}_{1-x}\text{Ge}_x \rangle}^{\text{S}}(T_0)$  and  $\gamma_{\{\text{Si}_{1-x}\text{Ge}_x\}}^{\text{S}}(T_0)$  acquired from experiment data;  $C_0$  is a constant relating the surface area to the corresponding bulk volume, with an average value of  $4.5 \times 10^8 \text{ mol}^{-1/3}$ ;  $V_{\langle \text{Si}_{1-x}\text{Ge}_x \rangle}^{2/3}$  and  $V_{\{\text{Si}_{1-x}\text{Ge}_x\}}^{2/3}$  stand for the molar volumes;;The surface entropies  $S_{\langle \text{Si}_{1-x}\text{Ge}_x \rangle}^{\text{S}}$  and  $S_{\{\text{Si}_{1-x}\text{Ge}_x\}}^{\text{S}}$  are approximately equal to 7.72 and 7.34  $\text{J mol}^{-1}\text{K}^{-1}$ .

### 3. Interface energy

a. Two crystalline phase:

$$\gamma_{\langle A \rangle / \langle B \rangle}^{\text{interface}} = \frac{G_{\langle A \rangle / \langle B \rangle}^{\text{interface}}}{0.35 \times C_0 \times \bar{V}_{\langle A \rangle / \langle B \rangle}^{2/3}}$$

b. One crystalline phase and one amorphous phase:

$$\gamma_{\langle A \rangle / \{B\}}^{\text{interface}} = \frac{G_{\langle A \rangle / \{B\}}^{\text{intf}}}{0.33 \times C_0 \times \bar{V}_{\langle A \rangle / \{B\}}^{2/3}}$$

Where, < > stands for the crystalline phase; { } stands for the amorphous phase; A and B could be  $\text{Si}_{1-x}\text{Ge}_x$ , Al, crystalline Si;  $G_{\langle A \rangle / \langle B \rangle}^{\text{interface}}$  and  $G_{\langle A \rangle / \{B\}}^{\text{interface}}$  mean interfacial Gibbs free energies between two phases;  $C_0$  is a constant relating the surface area to the corresponding bulk volume, with an average value of  $4.5 \times 10^8 \text{ mol}^{-1/3}$ ;  $\bar{V}_{\langle A \rangle / \langle B \rangle}^{2/3}$  or  $\bar{V}_{\langle A \rangle / \{B\}}^{2/3}$  stand for the average molar volume of A and B.

#### 4. Critical thickness

**Position 1:**

$$h_{\langle \text{Al} \rangle \text{GBs}}^{\text{critical}} = \frac{2 \times (\gamma_{\langle \text{Al} \rangle / \langle \text{Si}_{1-x}\text{Ge}_x \rangle}^{\text{interface}} - \gamma_{\langle \text{Al} \rangle / \{ \text{Si}_{1-x}\text{Ge}_x \}}^{\text{interface}})}{\Delta G_{\langle \text{Si}_{1-x}\text{Ge}_x \rangle - \{ \text{Si}_{1-x}\text{Ge}_x \}}^{\text{Crystal}}}$$

**Position 2:**

$$h_{\langle \text{Al} \rangle / \{ \text{Si}_{1-x}\text{Ge}_x \}}^{\text{critical}} = \frac{\gamma_{\langle \text{Al} \rangle / \langle \text{Si}_{1-x}\text{Ge}_x \rangle}^{\text{interface}} + \gamma_{\langle \text{Si}_{1-x}\text{Ge}_x \rangle / \{ \text{Si}_{1-x}\text{Ge}_x \}}^{\text{interface}} - \gamma_{\langle \text{Al} \rangle / \{ \text{Si}_{1-x}\text{Ge}_x \}}^{\text{interface}}}{\Delta G_{\langle \text{Si}_{1-x}\text{Ge}_x \rangle - \{ \text{Si}_{1-x}\text{Ge}_x \}}^{\text{Crystal}}}$$

**Position 3:**

$$h_{\langle \text{Al} \rangle / \langle \text{sc-Si} \rangle}^{\text{critical}} = \frac{\gamma_{\langle \text{Al} \rangle / \langle \text{Si}_{1-x}\text{Ge}_x \rangle}^{\text{interface}} - \gamma_{\langle \text{Al} \rangle / \{ \text{Si}_{1-x}\text{Ge}_x \}}^{\text{interface}} - \gamma_{\langle \text{sc-Si} \rangle / \{ \text{Si}_{1-x}\text{Ge}_x \}}^{\text{interface}}}{\Delta G_{\langle \text{Si}_{1-x}\text{Ge}_x \rangle - \{ \text{Si}_{1-x}\text{Ge}_x \}}^{\text{Crystal}}}$$

#### Reference:

1. Z. M. Wang, J. Y. Wang, L. P. H. Jeurgens and E. J. Mittemeijer, *Physical Review B*, 2008, **77**, 045424.
2. T.-W. Zhang, F. Ma, W.-L. Zhang, D.-Y. Ma, K.-W. Xu and P. K. Chu, *Applied*

*Physics Letters*, 2012, **100**.
